# Supplementary material for: Porous cobalt oxides with tunable hierarchical morphologies for supercapacitor electrodes
Source: Royal Society of Chemistry journal article supplement (doi:10.1039/c2ce26057c), 2012-01-01
Supplement: c2ce26057c.pdf [file c2ce26057c.pdf]

## Porous cobalt oxides with tunable hierarchical morphologies for supercapacitor electrodes

J.P. Cheng<sup>1,2,\*</sup>, X. Chen<sup>1</sup>, Jin-Song Wu<sup>2,\*</sup>, F. Liu<sup>1</sup>, X.B. Zhang<sup>1</sup>, Vinayak P. Dravid<sup>2</sup>

<sup>1</sup> State Key Laboratory of Silicon Materials, Department of Materials Science and Engineering, Zhejiang University, Hangzhou 310027, China

<sup>2</sup> Department of Materials Science and Engineering, Northwestern University, Evanston, Illinois 60208, United States

### Supporting Information:

**Figure S1.** SEM image of cobalt hydroxide prepared using cobalt chloride under a low magnification, showing microspherical particles are formed.

**Figure S2.** SEM images of cobalt hydroxides prepared using (a) chloride and (b) acetate, where 0.02 ml NaOH substituted ammonia solution, showing that small plate-like products are generated instead of hierarchical structure.

**Figure S3.** SEM images of cobalt hydroxides prepared using cobalt nitrate for 40 min reaction, showing nanocolumns consist of also (0001) hexagonal Co(OH)<sub>2</sub> nanosheets.

**Figure S4.** SEM image of the cobalt hydroxide prepared with reduced cobalt nitrate concentration (0.05 Mol/L) and ammonia solution at 70 °C for 1 hour.

**Figure S5.** XPS spectrum of cobalt oxide prepared by annealing cobalt hydroxide using acetate salt. The Co 2p XPS spectra of the cobalt oxide exhibit two peaks at about 795 and 780 eV, corresponding to the Co 2p<sub>1/2</sub> and Co 2p<sub>3/2</sub> spin-orbit peaks of Co<sub>3</sub>O<sub>4</sub>.

**Figure S6.** Discharge curves for the Co<sub>3</sub>O<sub>4</sub> samples fabricated with different cobalt salts, (a) nitrate, (b) chloride, and (c) acetate at different rates. The calculated specific capacitance values of the three samples prepared using nitrate, chloride and acetate are 218, 187 and 171 F g<sup>-1</sup> at 1.25 A g<sup>-1</sup>, respectively, consistent with these values calculated from CV curves.

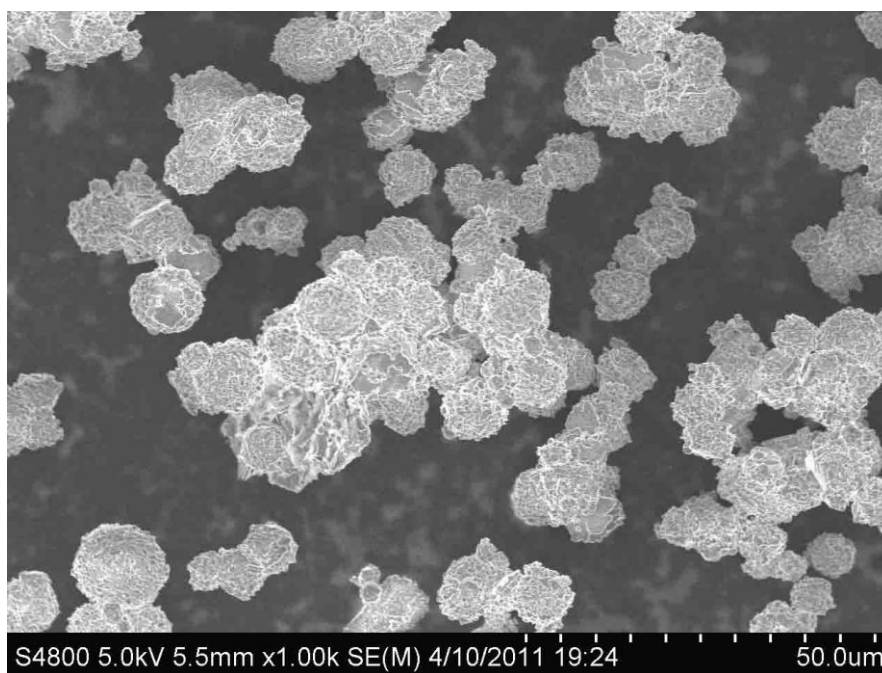

Figure S1. SEM image of cobalt hydroxide prepared using cobalt chloride under a low magnification, showing microspherical particle are formed.

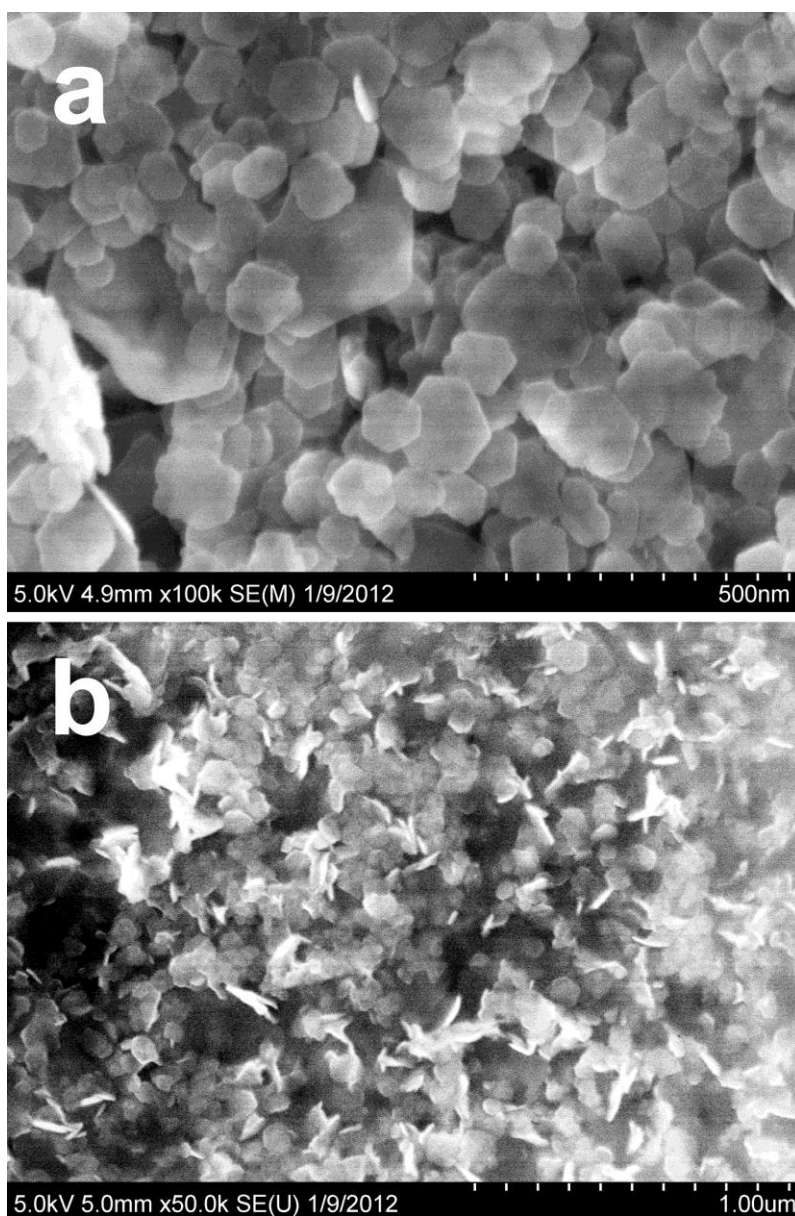

Figure S2. SEM images of cobalt hydroxides prepared using (a) chloride and (b) acetate, where 0.02ml NaOH substituted ammonia solution, showing that small plate-like products are generated instead of hierarchical structure.

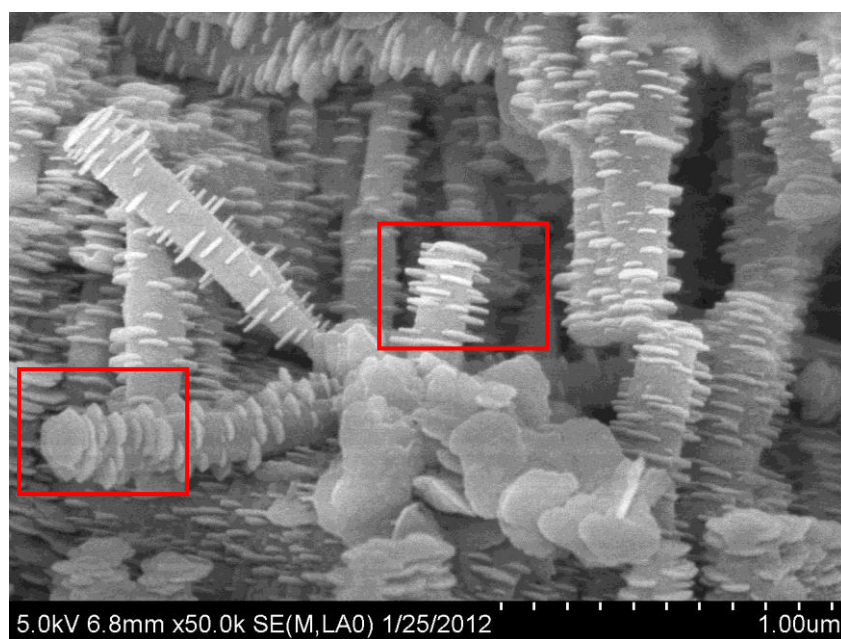

Figure S3. SEM images of cobalt hydroxides prepared using cobalt nitrate for 40 min reaction, showing nanocolumns consist of also (0001) hexagonal  $\text{Co}(\text{OH})_2$  nanosheets.

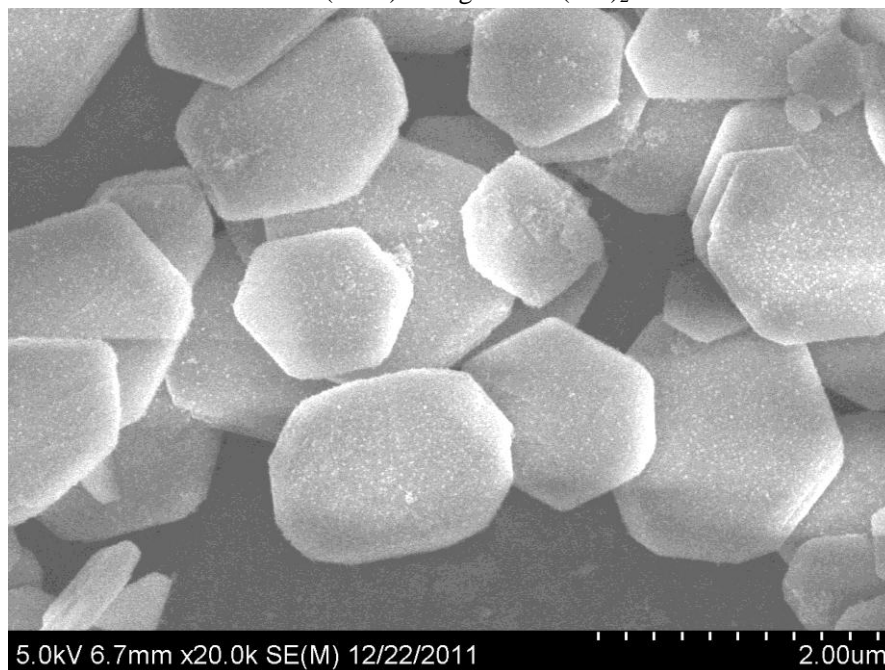

Figure S4. SEM image of the cobalt hydroxide prepared with reduced cobalt nitrate concentration (0.05 Mol/L) and ammonia solution at 70 °C for 1 hour.

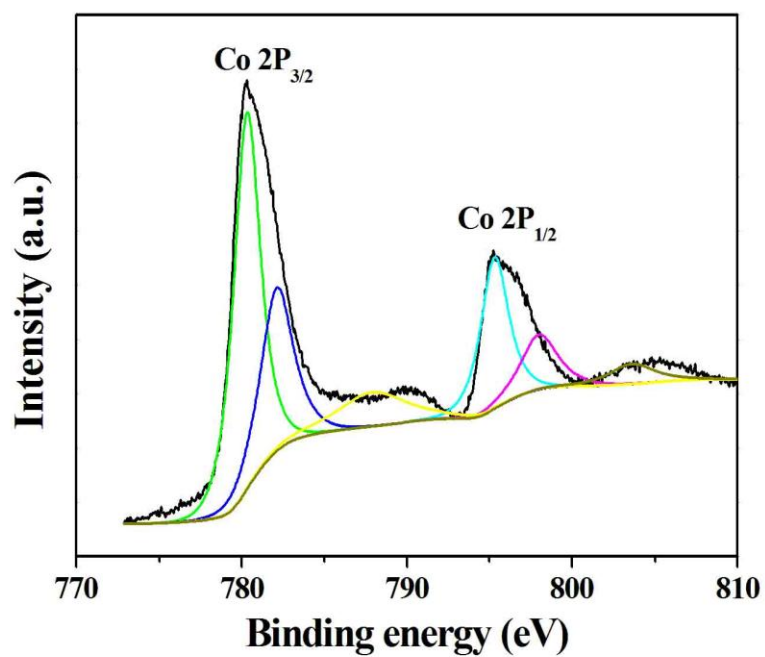

Figure S5. XPS spectrum of cobalt oxide prepared by annealing cobalt hydroxide using acetate salt. The Co 2p XPS spectra of the cobalt oxide exhibit two peaks at about 795 and 780 eV, corresponding to the Co 2p<sub>1/2</sub> and Co 2p<sub>3/2</sub> spin-orbit peaks of Co<sub>3</sub>O<sub>4</sub>.



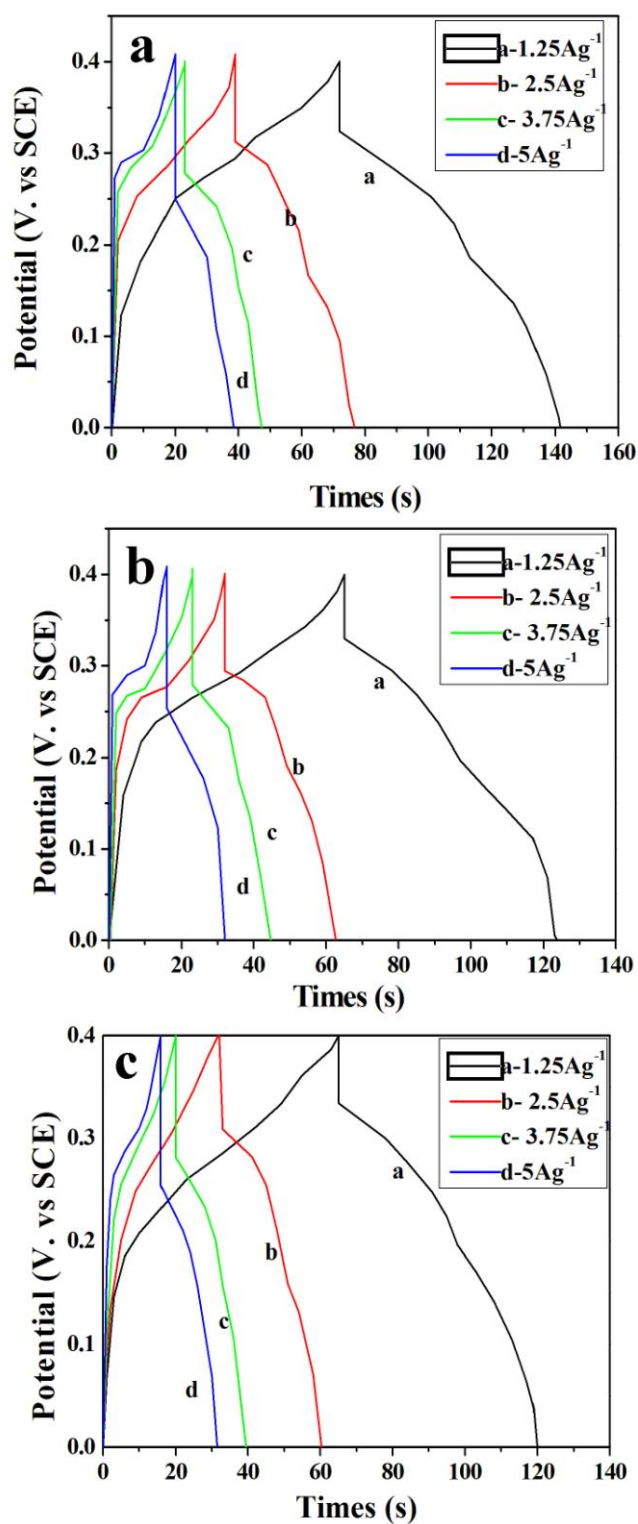

Figure S6 Discharge curves of for the  $\text{Co}_3\text{O}_4$  samples fabricated with different cobalt salts, (a) nitrate, (b) chloride, and (c) acetate at different rates. The calculated specific capacitance values of the three samples prepared using nitrate, chloride and acetate are 218, 187 and 171  $\text{F g}^{-1}$  at  $1.25 \text{ A g}^{-1}$ , respectively, consisting with these values calculated from CV curves.
